# Supplementary material for: Mechanism of Gene Amplification via Yeast Autonomously Replicating Sequences
Source: Hindawi journal article supplement (doi:10.1155/2015/387367), 2015-01-01
Supplement: f1 [file 387367.f1.pdf]

**Supplementary table I: Combined analysis of the *S. cerevisiae* ARS**

| Chr No. | ARS     | G     | TREP  | OE | SIDD   | FE      | FS  | RE | Curvature | G+C |
|---------|---------|-------|-------|----|--------|---------|-----|----|-----------|-----|
| 1       | 102     | 89.06 | 0     | 0  | 0      | tel     | 0   | 1  | 14        | 14  |
|         | 103     | 75.14 | 27.5  | 1  | 3.33   | 0       | 3   | 0  | 10        | 10  |
|         | 104     | 81.71 | 28.3  | 1  | 0.024  | TY1,LTR | 0   | 0  | 8         | 8   |
|         | 105     | 76.47 | 34.1  | 1  | 0      | 0       | 2   | 1  | 13        | 14  |
|         | 106     | 98.03 | 33.3  | 1  | 6.11   | 0       | 1   | 0  | 9         | 10  |
|         | 107     | 77.4  | 29.9  | 1  | -0.028 | LTR     | 2   | 1  | 12        | 12  |
|         | 108     | 79.56 | 18.2  | 1  | 0      | 0       | 5   | 1  | 12        | 12  |
|         | 109/101 | 87.1  | 0     | 1  | -0.13  | RT, LTR | 5   | 0  |           |     |
|         | 110     | 77.14 | 14.6  | 1  | 0      | RT,LTR  | 0   | 0  | 10        | 11  |
|         | 111     | 81.36 | 0     | 1  | 0      | LTR     | 0   | 1  | 16        | 16  |
|         | 112     | 79.36 | 29.9  | 1  | 0      | 0       | 4   | 1  | 14        | 16  |
|         | telo X  | 0     | 29.9  | 1  | 0      | 0       | 3   |    |           |     |
|         | 2       | 230   | 81.87 | 0  | 0      | 4.49    | LTR | 2  | 1         | 12  |
| 202     |         | 92.87 | 0     | 1  | 0      | 0       | 1   | 1  | 12        | 12  |
| 207     |         | 88.85 | 0     | 1  | 0      | 0       | 1   | 0  | 10        | 10  |
| 231     |         | 83.82 | 17.9  | 0  | 1.72   | LTR     | 2   | 0  | 10        | 10  |

Continued...

|          |     |       |      |   |        |        |   |   |    |    |
|----------|-----|-------|------|---|--------|--------|---|---|----|----|
|          | 208 | 78.33 | 19.1 | 1 | 0      | RT,LTR | 2 | 0 | 9  | 9  |
|          | 209 | 77.68 | 0    | 1 | 0      | LTR    | 6 | 1 | 12 | 13 |
|          | 211 | 88.17 | 0    | 1 | 0      | LTR    | 0 | 0 | 11 | 12 |
|          | 212 | 76.9  | 0    | 1 | 0      | 0      | 4 |   |    |    |
|          | 213 | 94.49 | 0    | 1 | 0      | 0      | 6 |   |    |    |
|          | 214 | 87.53 | 25.4 | 1 | 5.91   | 0      | 1 | 0 | 7  | 8  |
|          | 215 | 86.58 | 25.7 | 1 | 5.65   | 0      | 0 | 1 | 14 | 16 |
|          | 216 | 87.31 | 30.1 | 1 | -0.031 | 0      | 1 | 0 | 10 | 11 |
|          | 220 | 77.51 | 26.3 | 1 | -0.66  | 0      | 2 | 0 | 10 | 12 |
|          | 221 | 80.49 | 30.1 | 1 | 0.27   | LTR    | 2 |   |    |    |
|          | 222 | 77.71 | 29.4 | 1 | 0.08   | 0      | 2 | 1 | 12 | 12 |
|          | 224 | 85.98 | 30.3 | 1 | 8.3    | 0      | 2 | 0 | 10 | 10 |
|          | 225 | 76.91 | 33.1 | 1 | 1.19   | 0      | 1 | 1 | 14 | 14 |
|          | 228 | 77.01 | 37   | 1 | 0.37   | 0      | 1 | 0 | 9  | 9  |
|          |     |       |      |   |        |        |   |   |    |    |
| <b>3</b> | 300 | 78.61 | 0    |   | 0.94   | LTR    | 0 | 0 | 8  | 8  |
|          | 301 | 79.75 | 0    |   | 3.14   | LTR    | 1 | 0 | 11 | 12 |
|          | 302 | 0     | 0    |   | 4.47   | 0      | 2 | 1 | 14 | 14 |
|          | 303 | 0     | 0    |   | 7.451  | 0      | 3 | 1 | 12 | 12 |
|          | 320 | 77.64 | 0    |   | 0      | 0      | 5 | 1 | 14 | 14 |
|          | 304 | 0     | 0    |   | 7.6    | 0      | 3 | 0 | 10 | 10 |

Continued...

|          |       |       |      |  |       |     |   |   |    |    |
|----------|-------|-------|------|--|-------|-----|---|---|----|----|
|          | 305   | 81.16 | 12.6 |  | 2     | 0   | 3 | 0 | 11 | 11 |
|          | 306   | 83.2  | 10.8 |  | -0.33 | LTR | 2 | 1 | 14 | 14 |
|          | 307   | 73.47 | 19.8 |  | 3.33  | LTR | 3 | 0 | 10 | 10 |
|          | 308   | 70.19 | 19.8 |  | -0.4  | LTR | 3 | 0 | 10 | 10 |
|          | 309   | 72.31 | 22.5 |  | 1.6   | LTR | 2 | 0 | 10 | 10 |
|          | 310   | 78.43 | 24.9 |  | 0     | LTR | 4 | 1 | 12 | 14 |
|          | 313   | 79.48 | 16.3 |  | -0.28 | 0   | 2 | 0 | 10 | 12 |
|          | 314   | 76.22 | 16.9 |  | 1.83  | 0   | 2 | 1 | 14 | 14 |
|          | 314.5 |       | 16.9 |  | 0     | 0   | 0 |   |    |    |
|          | 315   | 88.34 | 14.8 |  | 1.19  | 0   | 1 | 1 | 13 | 14 |
|          | 316   | 86.13 | 33.4 |  | 2.57  | 0   | 2 | 1 | 12 | 12 |
|          | 317   | 62.83 | 31.1 |  | -0.32 | LTR | 2 | 0 | 10 | 12 |
|          | 318   | 67.72 | 31.1 |  | 4.83  | LTR | 2 | 1 | 12 | 14 |
|          | 319   | 72.02 | 0    |  | 0     | TEL | 0 | 1 | 12 | 14 |
|          |       |       |      |  |       |     |   |   |    |    |
| <b>4</b> | 400   | 80.13 | 0    |  | 0     | TEL | 0 | 0 | 10 | 12 |
|          | 403   | 0     | 0    |  | 0.65  | 0   | 0 | 0 | 9  | 9  |
|          | 404   | 69.79 | 36.5 |  | 2.19  | 0   | 2 | 1 | 14 | 14 |
|          | 405   | 70.44 | 34.2 |  | -0.07 | 0   | 2 | 1 | 14 | 14 |
|          | 405.5 | 0     | 0    |  | 0     | 0   | 0 |   |    |    |
|          | 406   | 71.36 | 29.4 |  | -0.57 | 0   | 2 | 1 | 12 | 12 |

Continued...

|  |       |       |      |  |        |     |   |   |    |    |
|--|-------|-------|------|--|--------|-----|---|---|----|----|
|  | 409   | 76.26 | 36   |  | 0.6    | 0   | 1 | 0 | 11 | 11 |
|  | 409.5 | 0     | 33.2 |  | -0.032 | 0   | 0 |   |    |    |
|  | 410   | 87.67 | 28.6 |  | 0.36   | 0   | 1 | 1 | 12 | 12 |
|  | 412   | 82.66 | 0    |  | 2.5    | 0   | 0 |   |    |    |
|  | 413   | 62.79 | 20.5 |  | -0.14  | 0   | 0 | 0 | 9  | 10 |
|  | 413.5 | 0     | 0    |  | 0      | 0   | 0 |   |    |    |
|  | 414   | 83.01 | 26.3 |  | -0.49  | 0   | 1 | 0 | 10 | 10 |
|  | 415   | 80.83 | 19.9 |  | -0.08  | LTR | 4 |   |    |    |
|  | 416   | 80.58 | 23.3 |  | 0.32   | 0   | 0 |   |    |    |
|  | 417   | 96.01 | 22   |  | 0.33   | 0   | 1 | 1 | 12 | 12 |
|  | 417.5 | 0     | 24.1 |  | 6.19   | 0   | 0 |   |    |    |
|  | 450   | 89.61 | 0    |  | 0      | LTR | 3 | 1 | 12 | 12 |
|  | 418   | 84.71 | 18   |  | 2.96   | LTR | 1 | 0 | 11 | 14 |
|  | 419   | 83.75 | 0    |  | 1.32   | 0   | 2 | 1 | 14 | 12 |
|  | 420   | 81.74 | 32.8 |  | 0.77   | 0   | 0 |   |    |    |
|  | 421   | 75.59 | 0    |  | 0.14   | LTR | 1 | 0 | 10 | 10 |
|  | 422   | 82.28 | 32.8 |  | 0.93   | 0   | 2 | 0 | 10 | 10 |
|  | 422.5 | 0     | 32.3 |  | -0.67  | 0   | 0 |   |    |    |
|  | 451   | 0     | 0    |  | 0      | 0   | 1 | 0 | 9  | 9  |
|  | 423   | 84    | 32.3 |  | -0.77  | 0   | 2 | 0 | 11 | 11 |

Continued...

|  |       |       |      |  |       |     |   |   |    |    |
|--|-------|-------|------|--|-------|-----|---|---|----|----|
|  | 425   | 92.94 | 38.8 |  | 7.04  | LTR | 1 | 0 | 9  | 9  |
|  | 427   | 80.14 | 0    |  | 0     | LTR | 0 |   |    |    |
|  | 428   | 0     | 12   |  | 6.03  | 0   | 2 | 1 | 12 | 12 |
|  | 429   | 81.61 | 12   |  | 0.01  | LTR | 2 | 0 | 10 | 10 |
|  | 430   | 87.26 | 24.3 |  | 0.83  | LTR | 2 | 0 | 9  | 8  |
|  | 430.5 | 0     | 0    |  | 0     | 0   | 0 |   |    |    |
|  | 431   | 77.74 | 32.6 |  | -0.41 | LTR | 2 | 1 | 14 | 14 |
|  | 431.5 | 0     | 35.9 |  | -0.21 | LTR | 0 |   |    |    |
|  | 452   | 72.14 | 0    |  | 0     | LTR | 2 | 1 | 14 | 14 |
|  | 432   | 86.34 | 12.6 |  | 0.02  | 0   | 1 | 0 | 10 | 10 |
|  | 432.5 | 0     | 12.6 |  | 3.5   | 0   | 0 |   |    |    |
|  | 453   | 82.9  | 0    |  | 0     | 0   | 1 | 0 | 9  | 10 |
|  | 433   | 88.65 | 36.7 |  | 1.88  | 0   | 2 | 0 | 11 | 11 |
|  | 434   | 85.18 | 36.9 |  | 3.6   | 0   | 1 | 1 | 12 | 12 |
|  | 435   | 73.92 | 32.9 |  | -0.36 | 0   | 1 | 0 | 11 | 11 |
|  | 439   | 75.42 | 0    |  | 0     | 0   | 0 |   |    |    |
|  | 440   | 85.96 | 30   |  | -0.54 | 0   | 1 | 1 | 14 | 16 |
|  | 441   |       | 29.4 |  | 0     | 0   | 0 |   |    |    |
|  | 443   | 76.54 | 0    |  | 0     | 0   | 2 | 0 | 11 | 10 |
|  | 446   | 87.91 | 35.9 |  | 3.37  | 0   | 2 | 0 | 8  | 8  |
|  |       |       |      |  |       |     |   |   |    |    |

Continued...

|          |       |       |      |  |       |        |   |   |    |     |
|----------|-------|-------|------|--|-------|--------|---|---|----|-----|
| <b>5</b> | 502   | 51.71 | 0    |  | 8.7   | 0      | 0 | 0 | 4  | 4.5 |
|          | 503   | 78.27 | 0    |  | 0     | 0      | 2 | 0 | 9  | 9   |
|          | 504   | 82.76 | 0    |  | 0     | 0      | 4 | 1 | 16 | 16  |
|          | 507   | 83.64 | 19.7 |  | 1.69  | LTR    | 2 | 0 | 11 | 11  |
|          | 508   | 81.2  | 14.3 |  | 1.98  | LTR    | 1 | 0 | 10 | 10  |
|          | 510   | 87.06 | 18.9 |  | 84.5  | LTR    | 1 | 0 | 8  | 9   |
|          | 511   | 80.46 | 18.7 |  | 2.37  | 0      | 1 | 1 | 12 | 12  |
|          | 511.5 | 0     | 0    |  | 7.59  | 0      | 0 |   |    |     |
|          | 512   | 82    | 29.5 |  | 1.26  | 0      | 1 | 1 | 14 | 14  |
|          | 513   | 78.33 | 0    |  | 0     | LTR    | 3 | 0 | 10 | 10  |
|          | 513.5 | 0     | 0    |  | -0.31 | LTR    | 0 |   |    |     |
|          | 514   | 91.04 | 22.6 |  | 6.85  | LTR    | 1 | 1 | 12 | 12  |
|          | 515   | 81.53 | 0    |  | 0     | LTR    | 1 | 0 | 9  | 9   |
|          | 516   | 82.47 | 24.3 |  | 1.76  | LTR    | 1 |   |    |     |
|          | 517   | 89.58 | 25.3 |  | 5.01  | 0      | 1 | 1 | 12 | 12  |
|          | 518   | 97.01 | 22.2 |  | 8.03  | LTR    | 0 | 0 | 10 | 12  |
|          | 519   | 90.7  | 22.2 |  | 6     | LTR    | 1 | 1 | 12 | 14  |
|          | 520   | 77.25 | 29.1 |  | 0     | RT,LTR | 4 | 1 | 16 | 16  |
|          | 521   | 71.67 | 0    |  | -0.26 | LTR    | 2 | 0 | 9  | 10  |
|          | 522   | 75.54 | 32.5 |  | -0.41 | LTR    | 1 | 0 | 10 | 12  |

Continued...

|          |       |       |      |  |       |        |   |   |    |     |
|----------|-------|-------|------|--|-------|--------|---|---|----|-----|
|          | 523   | 79.23 | 34.4 |  | 0     | LTR    | 2 | 0 | 10 | 12  |
|          |       |       |      |  |       |        |   |   |    |     |
| <b>6</b> | 600   | 82.31 | 0    |  | 0.32  | 0      | 0 | 0 | 11 | 11  |
|          | 601   | 82.31 | 42.4 |  | 1.87  | 0      | 2 | 0 | 9  | 9   |
|          | 602   | 83.15 | 42.4 |  | 0.4   | 0      | 1 | 1 | 12 | 14  |
|          | 603   | 76.46 | 36.2 |  | 2.82  | 0      | 1 | 1 | 12 | 12  |
|          | 603.1 | 0     | 0    |  | -0.11 | 0      | 1 |   |    |     |
|          | 603.5 | 0     | 21.5 |  | 0.94  | 0      | 0 | 0 | 10 | 11  |
|          | 604   | 91.84 | 21.5 |  | 8.42  | 0      | 0 | 1 | 12 | 12  |
|          | 605   | 44.68 | 25.4 |  | 2.81  | RT,LTR | 0 | 0 | 5  | 5.5 |
|          | 606   | 81.76 | 18.6 |  | -0.39 | LTR    | 1 | 1 | 18 | 18  |
|          | 607   | 43.05 | 12.8 |  | 6.2   | LTR    | 0 | 0 | 7  | 7   |
|          | 608   | 67.73 | 0    |  | -0.51 | 0      | 3 | 0 | 8  | 8   |
|          | 608.5 | 0     | 0    |  | -0.29 | 0      | 0 |   |    |     |
|          | 609   | 94.45 | 31.8 |  | 3.56  | 0      | 0 | 1 | 14 | 14  |
|          | 610   | 78.53 | 0    |  | 0.31  | TEL    | 3 | 0 | 10 | 12  |
|          |       |       |      |  |       |        |   |   |    |     |
| <b>7</b> | 702   | 80.82 | 32.6 |  | 7.28  | 0      | 2 | 0 | 10 | 11  |
|          | 704   | 84.87 | 31.2 |  | 0.24  | LTR    | 1 | 1 | 14 | 16  |
|          | 706   | 82.96 | 31.2 |  | -0.44 | LTR    | 1 | 0 | 10 | 9   |
|          | 707   | 75.84 | 31.4 |  | -0.32 | 0      | 1 | 0 | 8  | 8   |

Continued...

|  |           |       |      |  |       |        |   |   |    |    |
|--|-----------|-------|------|--|-------|--------|---|---|----|----|
|  | 710       | 83.39 | 31.9 |  | -0.03 | LTR    | 1 | 1 | 16 | 16 |
|  | 701/711   | 50.07 | 39.2 |  | 7.8   | 0      | 0 |   |    |    |
|  | 714       | 77.27 | 29.1 |  | 0.032 | 0      | 1 | 0 | 8  | 9  |
|  | 716       | 84.69 | 33.9 |  | 2.58  | 0      | 1 | 0 | 8  | 8  |
|  | 717       | 77.89 | 30.5 |  | -0.51 | LTR    | 1 | 0 | 8  | 9  |
|  | 718       | 89.03 | 30.8 |  | 0.66  | LTR    | 1 | 1 | 12 | 12 |
|  | 719       | 88.03 | 24.7 |  | 4.57  | 0      | 1 | 0 | 9  | 10 |
|  | 720       | 87.63 | 19.9 |  | -0.32 | 0      | 1 | 0 | 6  | 6  |
|  | 721       | 81.39 | 29.6 |  | 1.28  | RT,LTR | 2 | 0 | 8  | 8  |
|  | 722       | 72.95 | 29.2 |  | 0.47  | RT,LTR | 0 | 0 | 10 | 10 |
|  | 724       | 84.22 | 0    |  | 0     | 0      | 0 |   |    |    |
|  | 727       | 79.25 | 25.9 |  | 0.07  | LTR    | 1 | 1 | 12 | 12 |
|  | 728       | 76.23 | 30.6 |  | -0.56 | LTR    | 1 | 0 | 9  | 10 |
|  | 729       | 92.95 | 24.9 |  | 5.59  | RT,LTR | 0 | 0 | 10 | 10 |
|  | 731       | 83.66 | 22.5 |  | 3.34  | 0      | 1 | 0 | 9  | 9  |
|  | 731.5/737 | 80.38 | 21.8 |  | -0.55 | 0      | 1 |   |    |    |
|  | 735       | 81.17 | 0    |  | 0     | 0      | 0 |   |    |    |
|  | 733       | 0     | 34   |  | -0.02 | 0      | 3 | 1 | 14 | 14 |
|  | 734       | 80.67 | 0    |  | 0     | 0      | 0 | 1 | 12 | 11 |
|  | 736       | 88.72 | 28.8 |  | 0     | TEL    | 0 |   |    |    |
|  |           |       |      |  |       |        |   |   |    |    |

Continued...



|          |     |       |      |  |       |        |   |   |    |    |
|----------|-----|-------|------|--|-------|--------|---|---|----|----|
| <b>8</b> | 802 | 80.36 | 0    |  | 2.41  | LTR    | 1 | 1 | 12 | 12 |
|          | 801 | 78.55 | 0    |  | 0     | 0      | 0 |   |    |    |
|          | 805 | 0     | 26.4 |  | 1.83  | RT,LTR | 1 | 1 | 14 | 14 |
|          | 806 | 86.02 | 0    |  | 0     | LTR    | 0 |   |    |    |
|          | 807 | 83.81 | 23.4 |  | 5.24  | LTR    | 2 | 0 | 9  | 10 |
|          | 803 | 76.48 | 0    |  | 0     | 0      | 0 |   |    |    |
|          | 808 | 94.69 | 0    |  | 0     | 0      | 2 | 0 | 11 | 11 |
|          | 809 | 78.41 | 32   |  | 4.11  | 0      | 1 | 0 | 7  | 7  |
|          | 810 | 78.75 | 44.9 |  | 0.19  | 0      | 0 |   |    |    |
|          | 813 | 81.26 | 38.4 |  | 0.36  | 0      | 2 | 1 | 12 | 14 |
|          | 815 | 74.34 | 25.8 |  | -0.51 | 0      | 0 |   |    |    |
|          | 818 | 86.56 | 32.8 |  | 8.89  | LTR    | 1 | 0 | 10 | 10 |
|          | 820 | 79.75 | 25.4 |  | -0.06 | LTR    | 1 | 0 | 11 | 11 |
|          | 822 | 84.13 | 34.9 |  | 4.07  | LTR    | 1 | 0 | 8  | 8  |
|          | 823 | 0     | 0    |  | -0.37 | 0      | 0 |   |    |    |
|          | 824 | 73.85 | 0    |  | 1.86  | TEL    | 0 | 1 | 12 | 14 |
|          |     |       |      |  |       |        |   |   |    |    |
| <b>9</b> | 907 | 0     | 29   |  | 0.14  | 0      | 2 |   |    |    |
|          | 902 | 77.02 | 0    |  | 0     | 0      | 0 |   |    |    |
|          | 903 | 0     | 0    |  | 0     | 0      | 2 |   |    |    |
|          | 904 | 73.16 | 0    |  | 0     | 0      | 3 |   |    |    |

Continued...

|           |         |       |      |  |       |        |   |   |    |    |
|-----------|---------|-------|------|--|-------|--------|---|---|----|----|
|           | 905     | 0     | 0    |  | 0     | 0      | 6 |   |    |    |
|           | 909     | 78.1  | 26.9 |  | -0.02 | 0      | 1 | 0 | 10 | 10 |
|           | 910     | 83.95 | 0    |  | 0     | LTR    | 6 |   |    |    |
|           | 912     | 78.21 | 36.1 |  | -0.49 | 0      | 2 | 1 | 14 | 14 |
|           | 911.5   | 0     | 0    |  | -0.39 | 0      | 1 |   |    |    |
|           | 901/913 | 0     | 24.7 |  | -0.38 | RT,LTR | 1 |   |    |    |
|           | 913.5   | 0     | 0    |  | 1.53  | LTR    | 1 |   |    |    |
|           | 923     | 93.77 | 0    |  | 0     | 0      | 0 | 0 | 10 | 10 |
|           | 911     | 84.12 | 0    |  | 0     | 0      | 0 | 1 | 12 | 12 |
|           | 914     | 93.53 | 0    |  | 0     | 0      | 2 | 0 | 10 | 10 |
|           | 913     | 79.34 | 0    |  | 0     | 0      | 0 | 0 | 8  | 9  |
|           | 915     | 88.55 | 0    |  | 0     | 0      | 7 |   |    |    |
|           | 916     | 0     | 36.9 |  | -0.01 | 0      | 3 |   |    |    |
|           | 918     | 74.44 | 0    |  | 0     | 0      | 5 |   |    |    |
|           | 919     | 80.81 | 20.8 |  | 2.06  | 0      | 1 | 0 | 9  | 9  |
|           | 920     | 73.5  | 20.6 |  | 4.21  | 0      | 1 | 1 | 14 | 14 |
|           | 921     | 73.69 | 0    |  | 0     | 0      | 5 |   |    |    |
|           | 922     | 81.91 | 20.4 |  | -0.21 | LTR    | 1 | 0 | 10 | 9  |
|           | 923     | 93.77 | 0    |  | 0     | 0      | 0 |   |    |    |
|           |         |       |      |  |       |        |   |   |    |    |
| <b>10</b> | 1001    | 81.03 | 0    |  | 0.93  | TEL    | 0 | 1 | 12 | 14 |

Continued...

|  |        |       |      |  |       |        |   |   |    |    |
|--|--------|-------|------|--|-------|--------|---|---|----|----|
|  | 1002   | 80.37 | 0    |  | 9.09  | 0      | 1 | 1 | 14 | 14 |
|  | 1003   | 73.16 | 0    |  | -0.03 | 0      | 3 | 0 | 11 | 12 |
|  | 1004   | 79.98 | 38.7 |  | 0.98  | 0      | 3 | 0 | 10 | 10 |
|  | 1005   | 79.86 | 27   |  | -0.32 | LTR    | 2 | 0 | 11 | 12 |
|  | 1006   | 0     | 24.8 |  | -0.43 | 0      | 1 | 0 | 10 | 11 |
|  | 1007   | 78    | 32.8 |  | -0.34 | 0      | 3 | 0 | 9  | 9  |
|  | 1007.5 | 0     | 26.5 |  | 3.45  | 0      | 2 |   |    |    |
|  | 1008   | 77.52 | 24.8 |  | 0     | RT,LTR | 2 | 0 | 11 | 11 |
|  | 1009   | 78.71 | 25.6 |  | 0.89  | 0      | 3 | 0 | 10 | 11 |
|  | 1009.5 | 0     | 0    |  | 5.39  | 0      | 3 |   |    |    |
|  | 1010   | 76.91 | 33.2 |  | -0.12 | 0      | 3 | 1 | 14 | 14 |
|  | 1011   | 85.19 | 31.4 |  | 4.98  | 0      | 1 | 1 | 12 | 12 |
|  | 1012   | 84.97 | 15.6 |  | 8.58  | LTR    | 1 | 0 | 7  | 7  |
|  | 1013   | 72.41 | 15.6 |  | -0.16 | LTR    | 1 | 0 | 9  | 9  |
|  | 1014   | 79.25 | 16.6 |  | 8.16  | LTR    | 2 | 1 | 12 | 12 |
|  | 1015   | 80.01 | 21.4 |  | 1.92  | 0      | 2 | 1 | 12 | 12 |
|  | 1016   | 82.98 | 25.2 |  | 0     | 0      | 4 | 0 | 11 | 10 |
|  | 1017   | 90    | 25.2 |  | 7.82  | 0      | 2 | 0 | 10 | 10 |
|  | 1017.5 | 0     | 37.6 |  | 0     | 0      | 3 |   |    |    |
|  | 1018   | 84.47 | 17.3 |  | 4.38  | LTR    | 1 | 0 | 10 | 10 |
|  | 1018.5 | 0     | 19.1 |  | 3.58  | 0      | 3 |   |    |    |

Continued...

|           |        |       |       |  |        |     |   |   |    |    |
|-----------|--------|-------|-------|--|--------|-----|---|---|----|----|
|           | 1019   | 93.37 | 19.1  |  | 0.07   | 0   | 4 | 1 | 12 | 12 |
|           | 1020   | 92.37 | 24.4  |  | 7.42   | 0   | 1 | 1 | 14 | 14 |
|           | 1021   | 87.69 | 16.1  |  | 3.78   | 0   | 2 | 1 | 14 | 14 |
|           | 1022   | 81.84 | 31.7  |  | 3.29   | 0   | 1 | 1 | 12 | 12 |
|           | 1023   | 80.77 | 31.7  |  | 0.64   | 0   | 0 | 0 | 10 | 10 |
|           | 1024   | 86.5  | 35.9  |  | 8.18   | 0   | 1 | 1 | 12 | 12 |
|           | 1025   | 78.63 | 35.9  |  | 7.44   | 0   | 0 |   |    |    |
|           |        |       |       |  |        |     |   |   |    |    |
| <b>11</b> | 1104.5 | 0     | 26.2  |  | -0.02  | 0   | 2 |   |    |    |
|           | 1103   | 73.73 | 23.4  |  | 4.43   | LTR | 2 | 0 | 9  | 9  |
|           | 1104   | 80.1  | 0     |  | 0      | LTR | 6 |   |    |    |
|           | 1125   | 0     | 0     |  | 0      | 0   | 0 | 1 | 18 | 18 |
|           | 1102   | 79.06 | 0     |  | 0      | 0   | 0 |   |    |    |
|           | 1106   | 73.06 | 26.3  |  | 0.47   | LTR | 1 | 1 | 14 | 14 |
|           | 1126   | 77.86 | 0     |  | 0.27   | 0   | 2 | 1 | 11 | 12 |
|           | 1127   | 88.87 | 27.4  |  | 2.21   | LTR | 1 | 1 | 14 | 14 |
|           | 1109   | 73.06 | 25.5  |  | -0.028 | LTR | 2 | 1 | 14 | 14 |
|           | 1112   | 75.67 | 27.6  |  | -0.36  | 0   | 2 | 1 | 12 | 14 |
|           | 1113   | 73.28 | 23.89 |  | -0.35  | 0   | 2 | 0 | 10 | 11 |
|           | 1114   | 89.46 | 20.7  |  | 6.31   | LTR | 0 | 1 | 14 | 14 |
|           | 1116   | 77.26 | 26.6  |  | 0.61   | LTR | 1 | 0 | 11 | 11 |

Continued...

|           |        |       |      |  |        |     |   |   |    |    |
|-----------|--------|-------|------|--|--------|-----|---|---|----|----|
|           | 1118   | 83.05 | 29.6 |  | 0.77   | 0   | 1 | 0 | 8  | 9  |
|           | 1120   | 82.41 | 30.1 |  | 0.94   | 0   | 1 | 1 | 12 | 12 |
|           | 1123   | 85.79 | 32.6 |  | 2.2    | LTR | 1 | 0 | 9  | 9  |
|           | 1125   | 79.31 | 0    |  | 0      | 0   | 0 |   |    |    |
|           | 1126   | 88.67 | 0    |  | 0      | 0   | 0 |   |    |    |
|           |        |       |      |  |        |     |   |   |    |    |
| <b>12</b> | 1206   | 89.91 | 27.6 |  | 0.67   | LTR | 2 | 0 | 10 | 10 |
|           | 1207   | 80.91 | 0    |  | 0      | 0   | 0 |   |    |    |
|           | 1208   | 80.5  | 22.9 |  | -0.002 | CEN | 2 | 0 | 11 | 11 |
|           | 1209   | 85.55 | 22.9 |  | 3.65   | LTR | 2 | 0 | 10 | 9  |
|           | 1210   | 0     | 18.9 |  | 2.5    | LTR | 0 |   |    |    |
|           | 1211   | 89.73 | 18.9 |  | 6.77   | LTR | 1 | 1 | 14 | 14 |
|           | 1211.5 | 0     | 20.9 |  | 0.12   | 0   | 4 |   |    |    |
|           | 1212   | 79.08 | 33.4 |  | 4.85   | 0   | 1 | 0 | 11 | 10 |
|           | 1212.5 | 0     | 0    |  | -0.65  | 0   | 1 |   |    |    |
|           | 1213   | 84.25 | 16.5 |  | 3.27   | LTR | 1 | 0 | 10 | 12 |
|           | 1214   | 93.81 | 0    |  | 0      | 0   | 0 |   |    |    |
|           | 1215   | 85.29 | 21.4 |  | 3.89   | 0   | 0 | 0 | 10 | 9  |
|           | 1216   | 83.98 | 24.8 |  | 8.26   | LTR | 0 | 0 | 9  | 9  |
|           | 1216.5 | 0     | 0    |  | 7.47   | 0   | 0 |   |    |    |
|           | 1200-1 | 37.86 | 0    |  | 0      | 0   | 0 | 1 | 12 | 12 |

Continued...

|           |        |        |      |  |       |        |   |   |    |    |
|-----------|--------|--------|------|--|-------|--------|---|---|----|----|
|           | 1200-2 | 88.33  | 0    |  | 0     | 0      | 0 | 1 | 12 | 12 |
|           | 1217   | 82.96  | 21.8 |  | -0.45 | 0      | 3 | 1 | 12 | 12 |
|           | 1218   | 87.68  | 20   |  | 3.65  | RT,LTR | 1 | 0 | 11 | 11 |
|           | 1219   | 87.68  | 0    |  | 0     | 0      | 0 |   |    |    |
|           | 1220   | 96.8   | 28.5 |  | 0.02  | RT,LTR | 1 | 1 | 12 | 12 |
|           | 1223   | 83.1   | 18.5 |  | 3.38  | 0      | 1 | 0 | 10 | 10 |
|           | 1226   | 87.064 | 30.2 |  | 7.35  | LTR    | 2 | 0 | 8  | 8  |
|           | 1238   | 87.13  | 35.5 |  | -0.02 | 0      | 2 | 0 | 10 | 10 |
|           | 1230   | 87.61  | 0    |  | 0     | RT,LTR | 0 |   |    |    |
|           | 1232   | 70.38  | 27.8 |  | -0.22 | 0      | 1 | 1 | 12 | 12 |
|           | 1233   | 78.91  | 27.8 |  | -0.32 | 0      | 1 | 0 | 9  | 9  |
|           | 1234   | 0      | 29.4 |  | 2.71  | 0      | 1 | 1 | 14 | 16 |
|           | 1235   | 0      | 35.5 |  | 0.33  | 0      | 1 |   |    |    |
|           |        |        |      |  |       |        |   |   |    |    |
| <b>13</b> | 1303   | 82.49  | 27.4 |  | -0.46 | 0      | 1 | 1 | 14 | 16 |
|           | 1304   | 81.77  | 27.4 |  | -0.32 | 0      | 0 |   |    |    |
|           | 1305   | 78.24  | 22.9 |  | -0.34 | 0      | 2 | 1 | 16 | 16 |
|           | 1307   | 89.29  | 18.7 |  | 5.04  | LTR    | 1 | 1 | 12 | 12 |
|           | 1307.5 | 0      | 22.1 |  | 5.5   | 0      | 2 |   |    |    |
|           | 1308   | 83.34  | 12.3 |  | 8.87  | RT,LTR | 2 | 0 | 7  | 7  |
|           | 1309   | 92.21  | 19.1 |  | 5.29  | 0      | 0 | 0 | 9  | 9  |

Continued...

|           |        |       |      |  |        |        |   |   |    |    |
|-----------|--------|-------|------|--|--------|--------|---|---|----|----|
|           | 1310   | 89.61 | 14   |  | 6.14   | LTR    | 1 | 1 | 14 | 14 |
|           | 1312   | 83.34 | 23.2 |  | 3.06   | RT,LTR | 1 | 0 | 11 | 11 |
|           | 1316   | 76.82 | 27.2 |  | 0.012  | LTR    | 1 | 0 | 9  | 9  |
|           | 1317   | 89.09 | 0    |  | 0      | LTR    | 0 |   |    |    |
|           | 1320   | 70.84 | 20.4 |  | 2.54   | 0      | 2 | 0 | 9  | 9  |
|           | 1319   | 80.19 | 18.8 |  | 1.1    | LTR    | 2 |   |    |    |
|           | 1323   | 81.97 | 25.6 |  | -0.28  | 0      | 1 | 1 | 12 | 12 |
|           | 1322   | 83.5  | 0    |  | -0.02  | 0      | 2 |   |    |    |
|           | 1324   | 83.83 | 0    |  | -0.18  | 0      | 2 | 0 | 10 | 10 |
|           | 1321   | 36.48 | 0    |  | 0      | 0      | 0 |   |    |    |
|           | 1325   | 80.19 | 20.4 |  | 1.45   | 0      | 2 | 1 | 12 | 12 |
|           | 1327   | 90.65 | 27.6 |  | 2.43   | 0      | 2 | 1 | 16 | 16 |
|           | 1328   | 92.95 | 0    |  | 6.21   | LTR    | 1 | 1 | 12 | 12 |
|           | 1329   | 71.77 | 0    |  | -0.026 | LTR    | 2 | 0 | 9  | 10 |
|           | 1330   | 83.65 | 17.9 |  | -0.38  | LTR    | 1 | 1 | 14 | 14 |
|           | 1331   | 87.3  | 0    |  | 0      | LTR    | 0 |   |    |    |
|           | 1332   | 86.18 | 22.8 |  | 1.28   | 0      | 2 | 0 | 8  | 9  |
|           | 1331.5 | 80.39 | 0    |  | -0.48  | 0      | 2 |   |    |    |
|           |        |       |      |  |        |        |   |   |    |    |
| <b>14</b> | 1405   | 85.12 | 32   |  | 2.9    | 0      | 1 | 0 | 9  | 9  |
|           | 1406   | 81.23 | 27.8 |  | -0.17  | 0      | 2 | 1 | 12 | 12 |

Continued...

|           |        |       |      |  |       |        |   |   |    |    |
|-----------|--------|-------|------|--|-------|--------|---|---|----|----|
|           | 1407   | 83.4  | 25.5 |  | 2.23  | 0      | 1 | 0 | 10 | 12 |
|           | 1409   | 0     | 0    |  | 0     | RT,LTR | 0 | 0 | 5  | 5  |
|           | 1410   | 99.42 | 0    |  | 0     | 0      | 0 | 0 | 9  | 9  |
|           | 1411   | 89.66 | 30.4 |  | 8.57  | 0      | 1 | 0 | 7  | 7  |
|           | 1412   | 0     | 29.6 |  | 0.16  | 0      | 2 | 0 | 10 | 11 |
|           | 1413   | 78.29 | 29.1 |  | 1.68  | 0      | 1 | 0 | 10 | 12 |
|           | 1414   | 73.6  | 24.7 |  | -0.28 | 0      | 2 | 0 | 11 | 11 |
|           | 1415   | 82.77 | 21   |  | 0.33  | 0      | 4 | 1 | 14 | 14 |
|           | 1416   | 80.71 | 27.1 |  | 6.93  | 0      | 0 | 0 | 9  | 9  |
|           | 1417   | 86.17 | 0    |  | 0     | 0      | 0 | 1 | 14 | 14 |
|           | 1419   | 83.9  | 29.5 |  | 1.26  | 0      | 2 | 1 | 14 | 14 |
|           | 1420   | 82.91 | 27.2 |  | 5.36  | 0      | 1 |   | 12 | 12 |
|           | 1421   | 88.78 | 0    |  | 2.14  | LTR    | 2 | 0 | 10 | 9  |
|           | 1422   | 79.64 | 15.7 |  | -0.48 | LTR    | 2 | 0 | 9  | 9  |
|           | 1423   | 77.73 | 20.7 |  | -0.15 | RT,LTR | 5 | 0 | 8  | 8  |
|           | 1424   | 72.42 | 20.7 |  | 0     | 0      | 2 | 0 | 11 | 11 |
|           | 1425   | 84.97 | 0    |  | 0     | 0      | 0 | 0 | 10 | 10 |
|           | 1426   | 74.85 | 24.7 |  | -0.35 | LTR    | 1 | 1 | 15 | 15 |
|           | 1427   | 74.85 | 24.1 |  | 4.79  | 0      | 1 | 0 | 10 | 10 |
|           |        |       |      |  |       |        |   |   |    |    |
| <b>15</b> | 1506.5 | 0     | 24.5 |  | 0.12  | 0      | 0 |   |    |    |

Continued...



|  |        |       |       |  |       |        |   |   |     |     |
|--|--------|-------|-------|--|-------|--------|---|---|-----|-----|
|  | 1531   | 0     | 0     |  | 0     | 0      | 4 | 1 | 12  | 13  |
|  | 1501   | 77.54 | 0     |  | 0     | 0      | 0 | 0 | 9   | 9   |
|  | 1507   | 0     | 0     |  | -0.13 | 0      | 0 | 0 | 10  | 10  |
|  | 1502   | 43.93 | 0     |  | 0     | 0      | 0 | 0 | 6.7 | 6.7 |
|  | 1508   | 82.03 | 20.6  |  | 0.43  | 0      | 2 | 0 | 8   | 9   |
|  | 1509   | 80.48 | 18.8  |  | -0.09 | RT,LTR | 1 | 0 | 10  | 10  |
|  | 1509.5 | 0     | 0     |  | -0.04 | 0      | 4 |   |     |     |
|  | 1510   | 85.1  | 14.1  |  | 4.04  | 0      | 2 | 0 | 10  | 12  |
|  | 1510.5 | 0     | 17.2  |  | 4.83  | 0      | 0 |   |     |     |
|  | 1511   | 81.65 | 12.4  |  | -0.36 | 0      | 0 | 0 | 8   | 9   |
|  | 1512   | 94.54 | 0     |  | 0     | LTR    | 6 | 1 | 12  | 10  |
|  | 1513   | 76.5  | 17.6  |  | -0.07 | LTR    | 1 | 1 | 12  | 12  |
|  | 1513.5 | 77.54 | 19    |  | -0.31 | LTR    | 1 |   |     |     |
|  | 1514   | 0     | 19.1  |  | -0.29 | 0      | 2 |   |     |     |
|  | 1516   | 0     | 22    |  | -0.13 | 0      | 1 |   |     |     |
|  | 1517   | 0     | 22.14 |  | -0.18 | 0      | 0 |   |     |     |
|  | 1518   | 88.26 | 0     |  | 0     | RT,LTR | 7 | 0 | 9   | 9   |
|  | 1519   | 86.55 | 24.5  |  | -0.18 | LTR    | 2 | 1 | 12  | 12  |
|  | 1521   | 0     | 0     |  | -0.22 | RT,LTR | 1 | 0 | 11  | 11  |
|  | 1523   | 72.88 | 25.9  |  | -0.47 | 0      | 1 | 1 | 12  | 12  |

Continued...

|           |           |        |      |  |       |        |   |   |    |    |
|-----------|-----------|--------|------|--|-------|--------|---|---|----|----|
|           | 1524      | 91.2   | 26.9 |  | -0.01 | 0      | 1 | 0 | 10 | 10 |
|           | 1526      | 86.4   | 21.3 |  | 2.85  | 0      | 2 | 0 | 7  | 8  |
|           | 1528      | 81.18  | 0    |  | 0     | 0      | 1 | 0 | 10 | 10 |
|           | 1529.5    | 0      | 18.6 |  | -0.61 | 0      | 0 |   |    |    |
|           | 1529      | 90.43  | 26.7 |  | 6.1   | RT,LTR | 2 | 1 | 13 | 13 |
|           |           |        |      |  |       |        |   |   |    |    |
| <b>16</b> | 1601      | 0      | 29.9 |  | 0     | 0      | 2 |   |    |    |
|           | 1602      | 43.93  | 29.9 |  | 0     | RT,LTR | 0 |   |    |    |
|           | 1600      | 80.43  | 0    |  | 0     | 0      | 0 |   |    |    |
|           | 1603      | 94.96  | 0    |  | 0     | 0      | 0 |   |    |    |
|           | 1604      | 74.456 | 29.2 |  | -0.42 | RT,LTR | 3 | 1 | 13 | 14 |
|           | 1605      | 88.04  | 22.1 |  | 2.6   | RT,LTR | 1 | 0 | 7  | 8  |
|           | 1607      | 83.45  | 26.4 |  | 1.44  | 0      | 2 | 0 | 10 | 10 |
|           | 1611      | 41.07  | 0    |  | 0     | LTR    | 0 |   |    |    |
|           | 1614      | 78.81  | 20.6 |  | -0.5  | 0      | 1 | 1 | 12 | 12 |
|           | 1608      | 67.73  | 0    |  | 0     | 0      | 0 |   |    |    |
|           | 1618      | 84.9   | 20.8 |  | 0.81  | 0      | 1 | 0 | 11 | 11 |
|           | 1618.5    | 0      | 16.5 |  | 0     | 0      | 8 |   |    |    |
|           | 1619      | 87.5   | 16.5 |  | 0.68  | 0      | 2 | 0 | 10 | 10 |
|           | 1633/1620 | 0      | 24.2 |  | 2.15  | 0      | 0 |   |    |    |
|           | 1621      | 80.72  | 22.3 |  | 1.4   | RT,LTR | 1 |   |    |    |

Continued...

|  |        |       |      |  |       |        |   |   |    |    |
|--|--------|-------|------|--|-------|--------|---|---|----|----|
|  | 1622   | 88.34 | 21.5 |  | 2.96  | LTR    | 2 | 0 | 9  | 10 |
|  | 1622.5 | 0     | 21.5 |  | -0.51 | LTR    | 1 |   |    |    |
|  | 1623   | 87.54 | 19.3 |  | 1.12  | 0      | 2 | 0 | 9  | 9  |
|  | 1624   | 70.55 | 22.7 |  | -0.34 | 0      | 2 | 0 | 11 | 11 |
|  | 1625   | 93.01 | 22.7 |  | 6.13  | 0      | 1 | 1 | 14 | 14 |
|  | 1626   | 74.85 | 0    |  | -0.32 | 0      | 2 | 1 | 12 | 12 |
|  | 1626.5 | 0     | 15.9 |  | 0.56  | 0      | 0 |   |    |    |
|  | 1635   | 0     | 0    |  | 0     | LTR    | 1 | 1 | 12 | 12 |
|  | 1627   | 80.92 | 18.7 |  | 0.36  | 0      | 1 | 1 | 12 | 12 |
|  | 1628   | 67.66 | 21.7 |  | -0.37 | RT,LTR | 2 | 1 | 14 | 14 |
|  | 1629   | 43.92 | 0    |  | 0     | RT,LTR | 0 |   |    |    |
|  | 1630   | 76.12 | 28.7 |  | 3.39  | 0      | 2 | 0 | 10 | 10 |
|  | 1631   | 83.28 | 22.1 |  | 4.61  | 0      | 0 | 0 | 7  | 7  |
|  | 1632   | 0     | 0    |  | 0     | 0      | 0 |   |    |    |
|  | 1633   | 19.46 | 0    |  | 0     | 0      | 0 | 1 | 14 | 14 |
|  | 1620.5 | 0     | 0    |  | 0     | 0      | 2 |   |    |    |

\*Blank coloumns indicate that respective ARS failed to yield values for that parameter
